# Supplementary material for: Safety of Carotid Revascularization in Patients With a History of Coronary Heart Disease
Source: PubMed Central journal article supplement — Stroke. 2019 Jan 9;50(2):413–8. doi: 10.1161/STROKEAHA.118.023085 (PMC6358179; doi:10.1161/strokeaha.118.023085), 2019-01-09
Supplement: str-50-413-s001.pdf [file str-50-413-s001.pdf]

## **SUPPLEMENTARY MATERIAL**

### **Effect of glyceryl trinitrate on haemodynamics in acute stroke: data from the Efficacy of Nitric Oxide in Stroke trial**

|                                                                                                   |    |
|---------------------------------------------------------------------------------------------------|----|
| 1. Efficacy of Nitric Oxide in Stroke (ENOS) trial steering and international advisory committees | 2  |
| 2. Supplementary tables                                                                           | 3  |
| 3. Supplementary figures                                                                          | 10 |

## **1. Efficacy of Nitric Oxide in Stroke (ENOS) trial steering and international advisory committees**

### **Trial Steering Committee:**

D Thomas (Independent Chair to 2006, UK), G Venables (Independent Chair from 2006, UK), P Amarenco (Independent Physician, France), K Muir (Independent Physician, UK), P M W Bath (Chief Investigator, UK), N Sprigg (Deputy Chief Investigator, UK), E Berge (Norway), K R Lees (UK), S Pocock (Statistician from 2003, UK), A Shone (Sponsor's Representative, UK), A Skene (Statistician to 2003, UK), J M Wardlaw (Neuroradiologist, UK), D Whynes (Health economist, UK).

### **International Advisory Committee:**

P M W Bath (Chair, UK), E Berge (Norway), M Beridze (Georgia), C Bladin (Australia), V Caso (Italy), C Chen/H M Chang (Singapore), H Christensen (Denmark), R Collins (Eire), A Czlonkowska (Poland), E Díez-Tejedor (Spain), A El Etribi (Egypt), A R Ghani (Malaysia), J Gommans (New Zealand), A C Laska (Sweden), K R Lees (UK), J Navarro (Philippines), G Ntaios (Greece), S Ozturk (Turkey), S Phillips (Canada), K Prasad (India), H A de Silva (Sri Lanka), S Szatmari (Romania), L Wong (Hong Kong), Y-J Wang (China).

## 2. Supplementary tables

**Supplementary Table I: Baseline haemodynamics GTN vs. no GTN**

|                 | Overall      | GTN          | No GTN       |
|-----------------|--------------|--------------|--------------|
| Patients (N)    | 4011         | 2000         | 2011         |
| SBP min (mmHg)  | 160.3 (19.4) | 160.4 (19.3) | 160.3 (19.5) |
| SBP mean (mmHg) | 167.3 (19.0) | 167.4 (18.8) | 167.1 (19.2) |
| SBP max (mmHg)  | 174.2 (20.0) | 174.3 (19.7) | 174.0 (20.3) |
| SBP SD (mmHg)   | 7.3 (5.6)    | 7.3 (5.7)    | 7.3 (5.4)    |
| SBP CoV (%)     | 4.4 (3.5)    | 4.4 (3.6)    | 4.4 (3.3)    |
| MAP min (mmHg)  | 111.1 (13.1) | 111.3 (13.1) | 111.0 (13.2) |
| MAP mean (mmHg) | 115.4 (13.1) | 115.6 (12.9) | 115.2 (13.2) |
| MAP max (mmHg)  | 119.9 (14.0) | 120.0 (13.7) | 119.8 (14.3) |
| MAP SD (mmHg)   | 4.6 (3.7)    | 4.6 (3.8)    | 4.6 (3.7)    |
| MAP CoV (%)     | 4.0 (3.2)    | 4.0 (3.3)    | 4.0 (3.2)    |
| DBP min (mmHg)  | 84.7 (13.1)  | 84.8 (13.1)  | 84.6 (13.2)  |
| DBP mean (mmHg) | 89.5 (13.1)  | 89.7 (13.0)  | 89.4 (13.3)  |
| DBP max (mmHg)  | 94.6 (14.6)  | 94.8 (14.3)  | 94.4 (14.8)  |
| DBP SD (mmHg)   | 5.3 (4.5)    | 5.3 (4.6)    | 5.2 (4.5)    |
| DBP CoV (%)     | 5.9 (5.0)    | 5.9 (5.1)    | 5.8 (5.0)    |
| HR min (bpm)    | 74.5 (14.5)  | 74.7 (14.6)  | 74.3 (14.4)  |
| HR mean (bpm)   | 77.5 (14.7)  | 77.7 (14.8)  | 77.3 (14.6)  |
| HR max (bpm)    | 80.6 (15.7)  | 80.8 (15.8)  | 80.4 (15.7)  |
| HR SD (bpm)     | 3.3 (3.7)    | 3.3 (3.7)    | 3.2 (3.6)    |
| HR CoV (%)      | 4.2 (4.5)    | 4.2 (4.6)    | 4.2 (4.4)    |
| PP (mmHg)       | 77.7 (16.9)  | 77.7 (16.9)  | 77.8 (17.0)  |
| PPI             | 0.68 (0.15)  | 0.68 (0.15)  | 0.68 (0.15)  |
| RPP min         | 12163.1      | 12183.5      | 12142.9      |
| (mmHg.bpm)      | (2787.6)     | (2758.1)     | (2817.1)     |
| RPP mean        | 12968.1      | 12998.6      | 12937.8      |
| (mmHg.bpm)      | (2884.8)     | (2859.2)     | (2910.5)     |
| RPP max         | 13782.8      | 13817.0      | 13748.7      |
| (mmHg.bpm)      | (3153.7)     | (3123.4)     | (3183.8)     |
| RPP SD          | 853.9        | 861.4        | 846.5        |
| (mmHg.bpm)      | (767.1)      | (778.2)      | (756.1)      |
| RPP CoV (%)     | 6.6 (5.5)    | 6.6 (5.6)    | 6.5 (5.4)    |

Data are number (%) or mean (standard deviation [SD]). BP: blood pressure; CoV: coefficient of variation; DBP: diastolic BP; HR: heart rate; MAP: mean arterial pressure; PP: pulse pressure; PPI: pulse pressure index; RPP: rate pressure product; SBP: systolic BP.

**Supplementary Table II: Effect of GTN vs. no GTN on haemodynamic variables at day 1 excluding those with AF**

|              | <b>GTN</b>       | <b>No GTN</b>    | <b>Unadjusted Mean<br/>Difference (95% CI)</b> | <b>P</b>         | <b>Adjusted Mean<br/>Difference (95% CI)</b> | <b>P</b>         |
|--------------|------------------|------------------|------------------------------------------------|------------------|----------------------------------------------|------------------|
| Patients (N) | 1534             | 1582             |                                                |                  |                                              |                  |
| SBP min      | 153.1 (22.9)     | 160.4 (23.2)     | -7.34 (-8.96, -5.72)                           | <b>&lt;0.001</b> | -7.10 (-8.43, -5.77)                         | <b>&lt;0.001</b> |
| SBP mean     | 156.7 (22.9)     | 164.1 (22.9)     | -7.37 (-8.97, -5.76)                           | <b>&lt;0.001</b> | -7.14 (-8.42, -5.86)                         | <b>&lt;0.001</b> |
| SBP max      | 160.3 (23.4)     | 167.7 (23.4)     | -7.39 (-9.03, -5.75)                           | <b>&lt;0.001</b> | -7.14 (-8.47, -5.80)                         | <b>&lt;0.001</b> |
| SBP SD       | 5.6 (5.6)        | 5.7 (6.3)        | -0.10 (-0.54, 0.34)                            | 0.66             | -0.11 (-0.55, 0.33)                          | 0.62             |
| SBP CV (%)   | 3.6 (3.6)        | 3.5 (4.1)        | 0.07 (-0.21, 0.36)                             | 0.61             | 0.07 (-0.22, 0.35)                           | 0.65             |
| MAP min      | 105.9 (15.5)     | 110.7 (15.4)     | -4.82 (-5.91, -3.74)                           | <b>&lt;0.001</b> | -4.77 (-5.65, -3.89)                         | <b>&lt;0.001</b> |
| MAP mean     | 108.1 (15.4)     | 113.0 (15.4)     | -4.88 (-5.96, -3.80)                           | <b>&lt;0.001</b> | -4.84 (-5.71, -3.99)                         | <b>&lt;0.001</b> |
| MAP max      | 110.4 (15.9)     | 115.3 (15.8)     | -4.93 (-6.05, -3.82)                           | <b>&lt;0.001</b> | -4.85 (-5.77, -3.92)                         | <b>&lt;0.001</b> |
| MAP SD       | 3.5 (3.9)        | 3.6 (4.2)        | -0.12 (-0.42, 0.18)                            | 0.42             | -0.13 (-0.42, 0.17)                          | 0.41             |
| MAP CV (%)   | 3.3 (3.6)        | 3.2 (3.7)        | 0.04 (-0.23, 0.31)                             | 0.77             | 0.03 (-0.24, 0.30)                           | 0.81             |
| DBP min      | 81.3 (14.2)      | 85.0 (14.6)      | -3.64 (-4.66, -2.63)                           | <b>&lt;0.001</b> | -3.64 (-4.44, -2.84)                         | <b>&lt;0.001</b> |
| DBP mean     | 83.9 (14.2)      | 87.5 (14.6)      | -3.64 (-4.65, -2.62)                           | <b>&lt;0.001</b> | -3.69 (-4.48, -2.90)                         | <b>&lt;0.001</b> |
| DBP max      | 86.4 (14.9)      | 90.0 (15.3)      | -3.63 (-4.69, -2.56)                           | <b>&lt;0.001</b> | -3.70 (-4.59, -2.81)                         | <b>&lt;0.001</b> |
| DBP SD       | 3.9 (4.8)        | 4.0 (4.6)        | -0.03 (-0.37, 0.32)                            | 0.88             | -0.12 (-0.44, 0.20)                          | 0.47             |
| DBP CV (%)   | 4.7 (5.5)        | 4.5 (5.2)        | 0.18 (-0.21, 0.57)                             | 0.37             | 0.16 (-0.23, 0.55)                           | 0.41             |
| HR min       | 76.2 (14.6)      | 74.8 (14.5)      | 1.44 (0.41, 2.46)                              | <b>0.006</b>     | 1.35 (0.68, 2.02)                            | <b>&lt;0.001</b> |
| HR mean      | 77.8 (14.6)      | 76.3 (14.6)      | 1.48 (0.45, 2.51)                              | <b>0.005</b>     | 1.38 (0.73, 2.04)                            | <b>&lt;0.001</b> |
| HR max       | 79.3 (14.9)      | 77.8 (15.1)      | 1.53 (0.47, 2.58)                              | <b>0.005</b>     | 1.40 (0.69, 2.11)                            | <b>&lt;0.001</b> |
| HR SD        | 2.4 (3.2)        | 2.4 (3.6)        | 0.04 (-0.21, 0.29)                             | 0.76             | 0.04 (-0.21, 0.29)                           | 0.76             |
| HR CV (%)    | 3.1 (4.2)        | 3.1 (4.5)        | 0.03 (-0.29, 0.36)                             | 0.85             | 0.02 (-0.30, 0.34)                           | 0.90             |
| PP           | 72.8 (17.7)      | 76.6 (19.1)      | -3.73 (-5.02, -2.44)                           | <b>&lt;0.001</b> | -3.44 (-4.42, -2.47)                         | <b>&lt;0.001</b> |
| PPI          | 0.68 (0.15)      | 0.68 (0.16)      | -0.01 (-0.02, 0.01)                            | 0.41             | 0.00 (-0.01, 0.01)                           | 0.61             |
| RPP min      | 11811.1 (2990.1) | 12143.8 (3057.3) | -232.57 (-545.37, -119.77)                     | <b>0.002</b>     | -314.19 (-467.97, -160.41)                   | <b>&lt;0.001</b> |
| RPP mean     | 12219.5 (3031.9) | 12536.7 (3097.8) | -317.26 (-532.96, -101.56)                     | <b>0.004</b>     | -305.64 (-456.26, -155.01)                   | <b>&lt;0.001</b> |
| RPP max      | 12627.7 (3150.6) | 12929.7 (3232.2) | -301.95 (-526.57, -77.34)                      | <b>0.008</b>     | -290.21 (-453.97, -126.46)                   | <b>0.001</b>     |
| RPP SD       | 632.4 (701.9)    | 617.1 (793.4)    | 15.34 (-40.04, 70.72)                          | 0.59             | 13.43 (-41.48, 68.33)                        | 0.63             |

|            |           |           |                    |      |                    |      |
|------------|-----------|-----------|--------------------|------|--------------------|------|
| RPP CV (%) | 5.2 (5.8) | 5.0 (6.3) | 0.24 (-0.21, 0.69) | 0.30 | 0.22 (-0.23, 0.66) | 0.33 |
|------------|-----------|-----------|--------------------|------|--------------------|------|

Analysis of covariance (ANCOVA) with adjustment for baseline variable. AF: atrial fibrillation; BP: blood pressure; CoV: coefficient of variation; DBP: diastolic BP; HR: heart rate; MAP: mean arterial pressure; PP: pulse pressure; PPI: pulse pressure index; RPP: rate pressure product; SBP: systolic BP; SD: standard deviation.

**Supplementary Table III: Effect of GTN vs. no GTN on haemodynamic variables over days 1 to 7 overall**

|              | GTN              | No GTN           | Unadjusted Mean Difference (95% CI) | P                | Adjusted Mean Difference (95% CI) | P                |
|--------------|------------------|------------------|-------------------------------------|------------------|-----------------------------------|------------------|
| Patients (N) | 1996             | 2001             |                                     |                  |                                   |                  |
| SBP min      | 129.2 (20.1)     | 131.3 (20.2)     | -2.14 (-3.39, -0.89)                | <b>0.001</b>     | -2.25 (-3.38, -1.11)              | <b>&lt;0.001</b> |
| SBP mean     | 153.3 (19.0)     | 156.0 (18.8)     | -2.71 (-3.88, -1.54)                | <b>&lt;0.001</b> | -2.87 (-3.81, -1.91)              | <b>&lt;0.001</b> |
| SBP max      | 178.3 (22.9)     | 181.6 (22.5)     | -3.31 (-4.71, -1.90)                | <b>&lt;0.001</b> | -3.48 (-4.64, -2.32)              | <b>&lt;0.001</b> |
| SBP SD       | 15.5 (6.2)       | 15.9 (6.4)       | -0.38 (-0.77, 0.01)                 | 0.056            | -0.40 (-0.78, -0.02)              | <b>0.041</b>     |
| SBP CV (%)   | 10.2 (4.1)       | 10.3 (4.2)       | -0.08 (-0.34, 0.18)                 | 0.53             | -0.08 (-0.34, 0.17)               | 0.52             |
| MAP min      | 91.0 (13.6)      | 93.1 (13.7)      | -2.05 (-2.90, -1.20)                | <b>&lt;0.001</b> | -2.21 (-2.95, -1.46)              | <b>&lt;0.001</b> |
| MAP mean     | 106.9 (12.6)     | 109.1 (12.7)     | -2.15 (-2.93, -1.37)                | <b>&lt;0.001</b> | -2.33 (-2.96, -1.71)              | <b>&lt;0.001</b> |
| MAP max      | 123.8 (15.0)     | 126.0 (15.2)     | -2.28 (-3.22, -1.35)                | <b>&lt;0.001</b> | -2.48 (-3.27, -1.70)              | <b>&lt;0.001</b> |
| MAP SD       | 10.4 (4.1)       | 10.4 (4.2)       | -0.02 (-0.28, 0.24)                 | 0.89             | -0.03 (-0.29, 0.22)               | 0.81             |
| MAP CV (%)   | 9.8 (3.9)        | 9.6 (3.9)        | 0.17 (-0.07, 0.42)                  | 0.17             | 0.17 (-0.07, 0.42)                | 0.16             |
| DBP min      | 69.0 (11.9)      | 70.9 (12.3)      | -1.95 (-2.70, -1.20)                | <b>&lt;0.001</b> | -2.12 (-2.75, -1.48)              | <b>&lt;0.001</b> |
| DBP mean     | 83.8 (11.2)      | 85.6 (11.8)      | -1.87 (-2.59, -1.16)                | <b>&lt;0.001</b> | -2.07 (-2.61, -1.52)              | <b>&lt;0.001</b> |
| DBP max      | 100.3 (14.5)     | 102.2 (14.6)     | -1.97 (-2.87, -1.07)                | <b>&lt;0.001</b> | -2.16 (-2.94, -1.39)              | <b>&lt;0.001</b> |
| DBP SD       | 9.7 (3.9)        | 9.7 (3.9)        | 0.01 (-0.24, 0.25)                  | 0.97             | 0.00 (-0.25, 0.24)                | 0.97             |
| DBP CV (%)   | 11.7 (4.7)       | 11.5 (4.6)       | 0.24 (-0.05, 0.53)                  | 0.10             | 0.26 (-0.03, 0.54)                | 0.08             |
| HR min       | 66.1 (12.0)      | 65.2 (11.4)      | 0.97 (0.24, 1.69)                   | <b>0.009</b>     | 0.82 (0.23, 1.41)                 | <b>0.006</b>     |
| HR mean      | 78.2 (12.4)      | 77.1 (12.0)      | 1.12 (0.36, 1.88)                   | <b>0.004</b>     | 0.93 (0.38, 1.49)                 | <b>0.001</b>     |
| HR max       | 92.2 (16.7)      | 90.9 (16.9)      | 1.22 (0.18, 2.26)                   | <b>0.020</b>     | 1.01 (0.15, 1.87)                 | <b>0.020</b>     |
| HR SD        | 8.4 (4.7)        | 8.3 (4.6)        | 0.07 (-0.22, 0.36)                  | 0.63             | 0.06 (-0.23, 0.34)                | 0.70             |
| HR CV (%)    | 10.7 (5.6)       | 10.7 (5.5)       | -0.01 (-0.36, 0.33)                 | 0.95             | -0.01 (-0.36, 0.33)               | 0.94             |
| PP           | 69.5 (14.6)      | 70.4 (14.8)      | -0.84 (-1.75, 0.08)                 | 0.07             | -0.79 (-1.48, -0.10)              | <b>0.025</b>     |
| PPI          | 0.65 (0.12)      | 0.65 (0.13)      | 0.00 (0.00, 0.01)                   | 0.28             | 0.01 (0.00, 0.01)                 | <b>0.034</b>     |
| RPP min      | 9361.5 (2225.5)  | 9368.4 (2164.7)  | -7.00 (-143.16, 129.19)             | 0.92             | -29.78 (-145.93, 86.37)           | 0.62             |
| RPP mean     | 11984.6 (2417.4) | 12028.3 (2411.9) | -43.73 (-193.5, 106.05)             | 0.57             | -78.39 (-193.08, 36.30)           | 0.18             |
| RPP max      | 15090.2 (3398.3) | 15195.5 (3502.7) | -105.31 (-319.37, 108.75)           | 0.34             | -152.13 (-325.96, 21.71)          | 0.09             |
| RPP SD       | 1805.8 (874.1)   | 1841.8 (908.1)   | -36.01 (-91.33, 19.30)              | 0.20             | -42.45 (-94.99, 10.10)            | 0.11             |

|            |            |            |                     |      |                     |      |
|------------|------------|------------|---------------------|------|---------------------|------|
| RPP CV (%) | 15.1 (6.7) | 15.3 (6.7) | -0.16 (-0.58, 0.25) | 0.44 | -0.18 (-0.59, 0.23) | 0.39 |
|------------|------------|------------|---------------------|------|---------------------|------|

Data mean (SD) or mean difference (95% confidence intervals). Analysis of covariance (ANCOVA) with adjustment for baseline variable. BP: blood pressure; CoV: coefficient of variation; DBP: diastolic BP; HR: heart rate; MAP: mean arterial pressure; PP: pulse pressure; PPI: pulse pressure index; RPP: rate pressure product; SBP: systolic BP; SD: standard deviation.

**Supplementary Table IV: Effect of GTN vs. no GTN on haemodynamic variables over days 1 to 7 excluding those with AF**

|              | GTN              | No GTN           | Unadjusted Mean Difference (95% CI) | P                | Adjusted Mean Difference (95% CI) | P                |
|--------------|------------------|------------------|-------------------------------------|------------------|-----------------------------------|------------------|
| Patients (N) | 1602             | 1636             |                                     |                  |                                   |                  |
| SBP min      | 130.7 (20.1)     | 132.4 (20.3)     | -1.74 (-3.13, -0.34)                | <b>0.015</b>     | -1.75 (-3.00, -0.50)              | <b>0.006</b>     |
| SBP mean     | 154.2 (19.3)     | 156.6 (19.3)     | -2.40 (-3.73, -1.07)                | <b>&lt;0.001</b> | -2.43 (-3.50, -1.37)              | <b>&lt;0.001</b> |
| SBP max      | 178.9 (23.3)     | 181.8 (23.1)     | -2.92 (-4.52, -1.32)                | <b>&lt;0.001</b> | -2.92 (-4.24, -1.61)              | <b>&lt;0.001</b> |
| SBP SD       | 15.2 (6.2)       | 15.6 (6.3)       | -0.43 (-0.86, 0.05)                 | 0.053            | -0.43 (-0.85, -0.01)              | <b>0.046</b>     |
| SBP CV (%)   | 9.9 (4.0)        | 10.1 (4.0)       | -0.14 (-0.41, 0.14)                 | 0.34             | -0.13 (-0.41, 0.15)               | 0.35             |
| MAP min      | 91.8 (13.6)      | 93.6 (13.8)      | -1.78 (-2.73, -1.84)                | <b>&lt;0.001</b> | -1.87 (-2.69, -1.04)              | <b>&lt;0.001</b> |
| MAP mean     | 107.2 (12.8)     | 109.1 (12.9)     | -1.94 (-2.83, -1.05)                | <b>&lt;0.001</b> | -2.05 (-2.74, -1.35)              | <b>&lt;0.001</b> |
| MAP max      | 123.8 (15.3)     | 125.7 (15.4)     | -1.96 (-3.02, -0.90)                | <b>&lt;0.001</b> | -2.01 (-2.89, -1.12)              | <b>&lt;0.001</b> |
| MAP SD       | 10.1 (4.1)       | 10.2 (4.1)       | -0.05 (-0.33, 0.23)                 | 0.89             | -0.04 (-0.32, 0.24)               | 0.77             |
| MAP CV (%)   | 9.5 (3.8)        | 9.4 (3.8)        | 0.11 (-0.15, 0.38)                  | 0.41             | 0.11 (-0.15, 0.38)                | 0.40             |
| DBP min      | 69.4 (12.0)      | 71.2 (12.4)      | -1.77 (-2.61, -0.93)                | <b>&lt;0.001</b> | -1.86 (-2.56, -1.17)              | <b>&lt;0.001</b> |
| DBP mean     | 83.7 (11.4)      | 85.4 (11.8)      | -1.71 (-2.51, -0.91)                | <b>&lt;0.001</b> | -1.85 (-2.45, -1.25)              | <b>&lt;0.001</b> |
| DBP max      | 99.8 (14.7)      | 101.6 (14.7)     | -1.82 (-2.83, -0.81)                | <b>&lt;0.001</b> | -1.94 (-2.81, -1.06)              | <b>&lt;0.001</b> |
| DBP SD       | 9.4 (3.9)        | 9.4 (3.8)        | -0.04 (-0.31, 0.22)                 | 0.75             | -0.04 (-0.31, 0.22)               | 0.76             |
| DBP CV (%)   | 11.3 (4.7)       | 11.2 (4.6)       | 0.15 (-0.17, 0.47)                  | 0.35             | 0.15 (-0.17, 0.46)                | 0.36             |
| HR min       | 65.7 (11.5)      | 64.9 (11.1)      | 0.82 (0.04, 1.60)                   | <b>0.039</b>     | 0.80 (0.20, 1.41)                 | <b>0.010</b>     |
| HR mean      | 77.0 (11.8)      | 76.1 (11.7)      | 0.97 (0.16, 1.78)                   | <b>0.019</b>     | 0.94 (0.36, 1.53)                 | <b>0.002</b>     |
| HR max       | 90.3 (15.5)      | 89.3 (16.0)      | 0.99 (-0.10, 2.07)                  | 0.07             | 0.95 (0.04, 1.85)                 | <b>0.040</b>     |
| HR SD        | 7.9 (4.3)        | 7.9 (4.2)        | 0.03 (-0.27, 0.32)                  | 0.86             | 0.03 (-0.27, 0.32)                | 0.85             |
| HR CV (%)    | 10.3 (5.2)       | 10.3 (5.2)       | -0.05 (-0.41, 0.31)                 | 0.80             | -0.05 (-0.41, 0.30)               | 0.77             |
| PP           | 70.4 (14.5)      | 71.1 (15.0)      | -0.69 (-1.71, 0.33)                 | 0.18             | -0.59 (-1.35, -0.18)              | 0.13             |
| PPI          | 0.66 (0.12)      | 0.65 (0.13)      | 0.01 (0.00, 0.01)                   | 0.28             | 0.01 (0.00, 0.01)                 | <b>0.033</b>     |
| RPP min      | 9393.1 (2195.1)  | 9381.8 (2121.9)  | 11.31 (-137.44, 160.07)             | 0.88             | 16.95 (-107.39, 141.28)           | 0.79             |
| RPP mean     | 11884.0 (2380.8) | 11916.9 (2394.0) | -32.89 (-197.42, 131.65)            | 0.70             | -33.27 (-155.89, 89.34)           | 0.60             |
| RPP max      | 14854.3 (3296.5) | 14954.8 (3454.4) | -100.47 (-333.22, 132.28)           | 0.40             | -102.87 (-291.00, 85.26)          | 0.28             |



|            |                |                |                         |      |                         |      |
|------------|----------------|----------------|-------------------------|------|-------------------------|------|
| RPP SD     | 1717.6 (817.1) | 1761.9 (855.8) | -44.29 (-101.98, 13.40) | 0.13 | -44.55 (-101.76, 12.65) | 0.13 |
| RPP CV (%) | 14.5 (6.2)     | 14.7 (6.3)     | -0.24 (-0.68, 0.19)     | 0.27 | -0.25 (-0.68, 0.18)     | 0.26 |

---

Data mean (SD) or mean difference (95% confidence intervals). Analysis of covariance (ANCOVA) with adjustment for baseline variable. AF: atrial fibrillation; BP: blood pressure; CoV: coefficient of variation; DBP: diastolic BP; HR: heart rate; MAP: mean arterial pressure; PP: pulse pressure; PPI: pulse pressure index; RPP: rate pressure product; SBP: systolic BP; SD: standard deviation.

### 3. Supplementary Figures

a) Unadjusted mRS, day 90

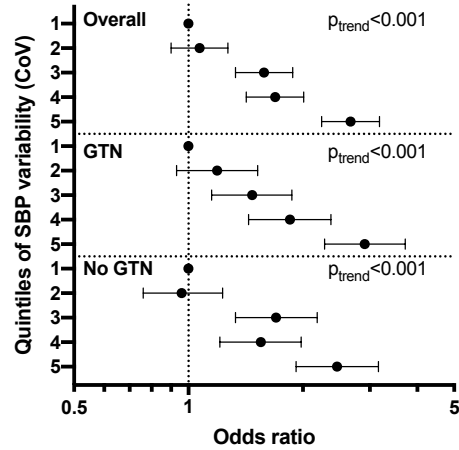

b) Adjusted mRS, day 90

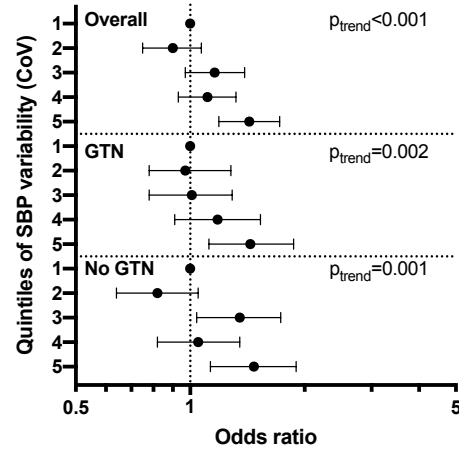

c) Death, day 90

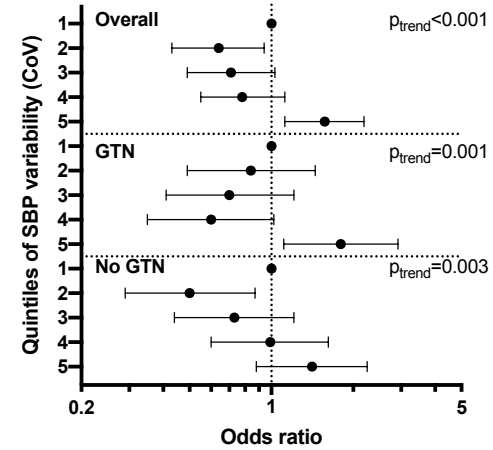

d) t-MMSE, day 90

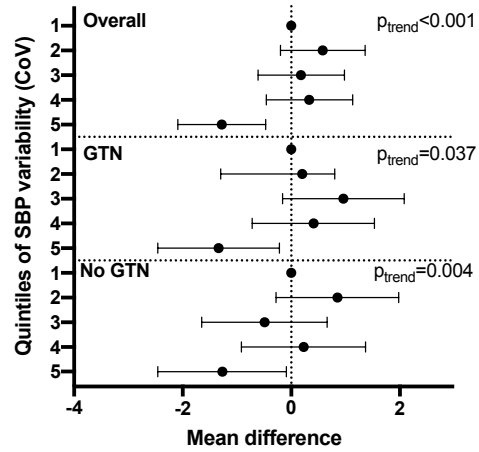

e) TICS-M, day 90

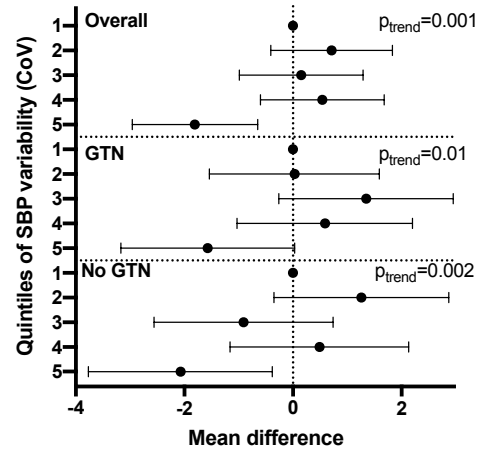

f) Verbal fluency, day 90

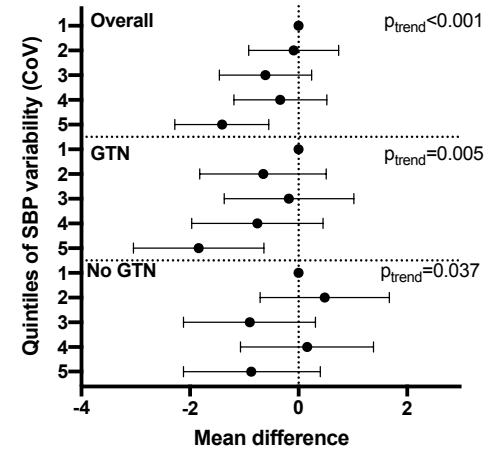

**Supplementary Figure 1: Effect of SBP variability over days 1 to 7 (CoV) on day 90 outcomes**

a-b: Quintiles of SBP variability over days 1 to 7 (CoV) vs. mRS at day 90 overall and in GTN and no GTN groups, with the first quintile as reference, (a) overall unadjusted (n=3978), (b) overall adjusted (n=3978).

c: Quintiles of SBP variability over days 1 to 7 (CoV) vs. death at day 90 overall (n=3982) and in GTN and no GTN groups, with the first quintile as reference.

d-f: Quintiles of SBP variability over days 1 to 7 (CoV) vs. cognitive outcomes at day 90 overall and in GTN and no GTN groups, with the first quintile as reference, (d) t-MMSE (n=2019), (e) TICS-M (n=2001), (f) verbal fluency (n=2352).

Ordinal (a-b) or binary (c) logistic or multiple linear (d-f) regression with adjustment for age, sex, baseline mRS, history of previous stroke, history of diabetes, final diagnosis, prior nitrate use, baseline SSS, total anterior circulation stroke, thrombolysis, feeding status, time to randomisation, baseline SBP, GTN vs no GTN, continue/stop. Data are odds ratios or mean difference with 95% confidence intervals. AF: atrial fibrillation; CoV: coefficient of variation; GTN: glyceryl trinitrate; mRS: modified Rankin Scale; SBP: systolic blood pressure; SSS: Scandinavian Stroke Scale; t-MMSE: telephone mini-mental state examination; TICS-M: modified telephone interview for cognition scale.

a) Unadjusted mRS, day 90

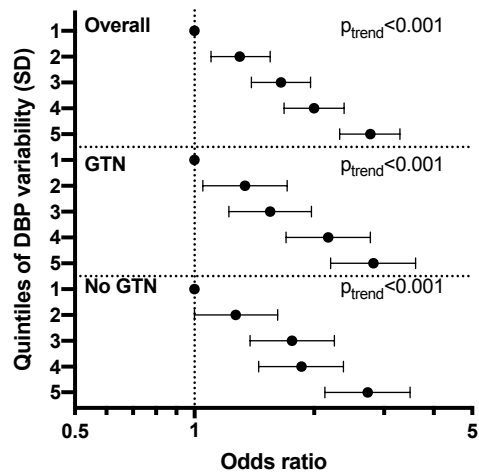

b) Adjusted mRS, day 90

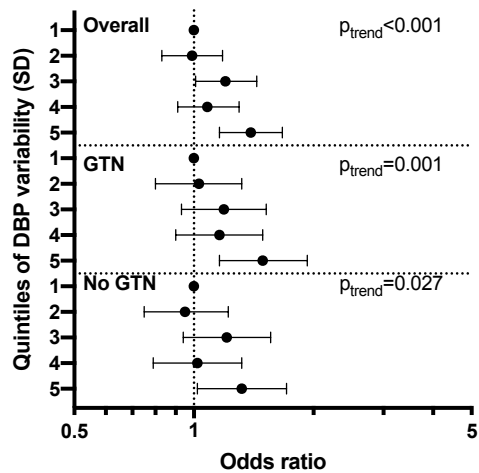

c) Death, day 90

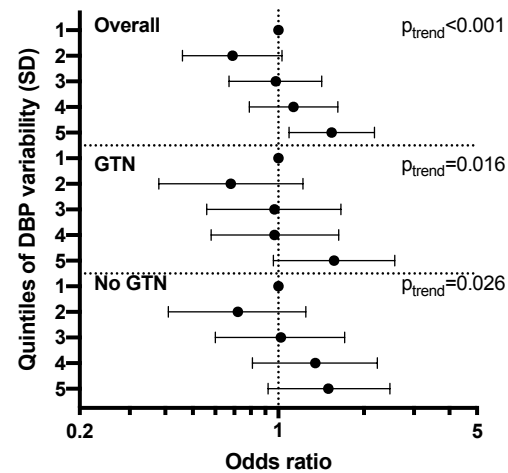

d) t-MMSE, day 90

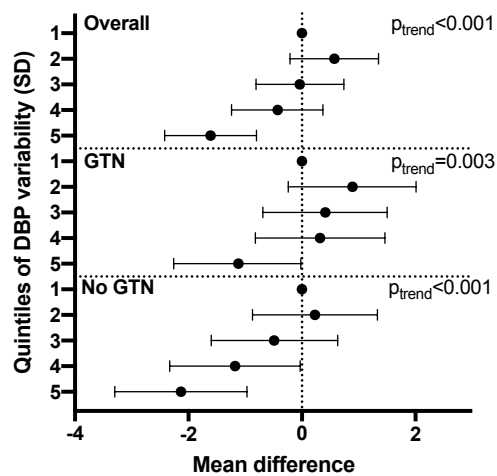

e) TICS-M, day 90

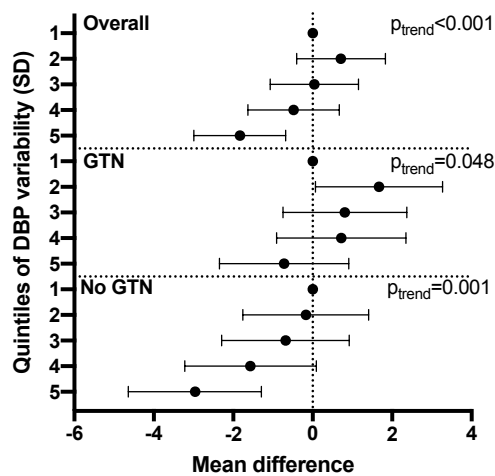

f) Verbal fluency, day 90

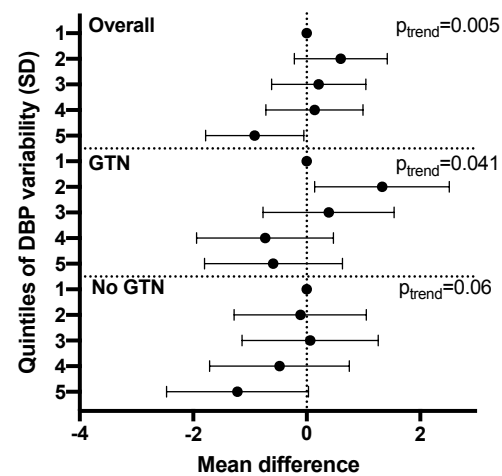

**Supplementary Figure II: Effect of DBP variability over days 1 to 7 (SD) on day 90 outcomes**

a-b: Quintiles of DBP variability over days 1 to 7 (SD) vs. mRS at day 90 overall and in GTN and no GTN groups, with the first quintile as reference, (a) overall unadjusted (n=3978), (b) overall adjusted (n=3978).

c: Quintiles of DBP variability over days 1 to 7 (SD) vs. death at day 90 overall (n=3982) and in GTN and no GTN groups, with the first quintile as reference.

d-f: Quintiles of DBP variability over days 1 to 7 (SD) vs. cognitive outcomes at day 90 overall and in GTN and no GTN groups, with the first quintile as reference, (d) t-MMSE (n=2019), (e) TICS-M (n=2001), (f) verbal fluency (n=2352).

Ordinal (a-b) or binary (c) logistic or multiple linear (d-f) regression with adjustment for age, sex, baseline mRS, history of previous stroke, history of diabetes, final diagnosis, prior nitrate use, baseline SSS, total anterior circulation stroke, thrombolysis, feeding status, time to randomisation, baseline SBP, GTN vs no GTN, continue/stop. Data are odds ratios or mean difference with 95% confidence intervals. AF: atrial fibrillation; DBP: diastolic blood pressure; GTN: glyceryl trinitrate; mRS: modified Rankin Scale; SD: standard deviation; SSS: Scandinavian Stroke Scale; t-MMSE: telephone mini-mental state examination; TICS-M: modified telephone interview for cognition scale.

a) Unadjusted mRS, day 90

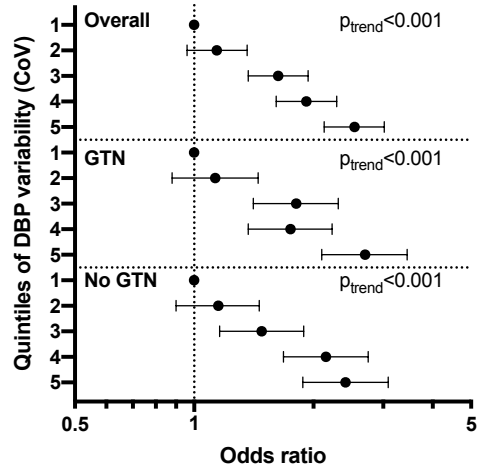

b) Adjusted mRS, day 90

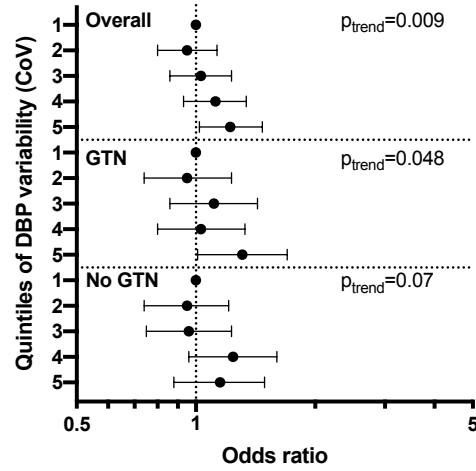

c) Death, day 90

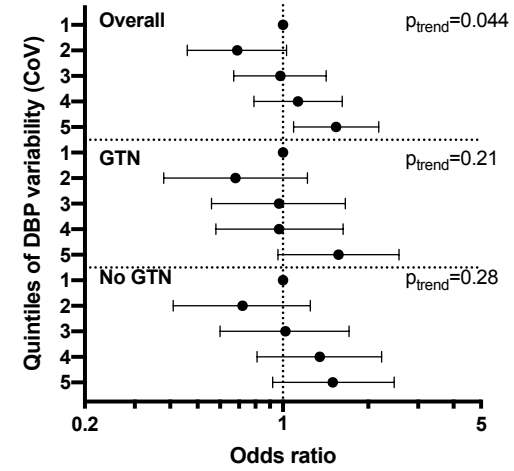

d) t-MMSE, day 90

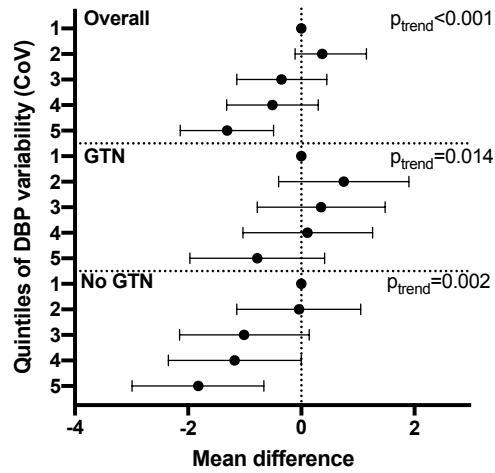

e) TICS-M, day 90

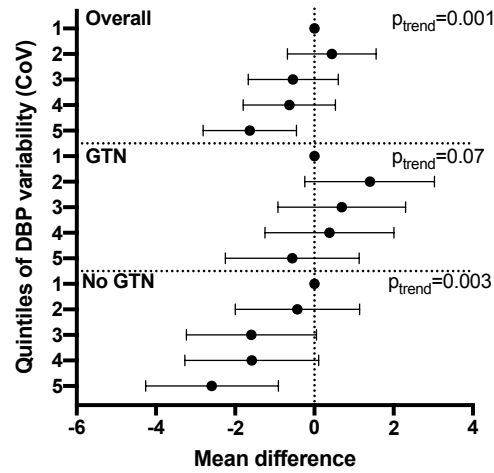

f) Verbal fluency, day 90

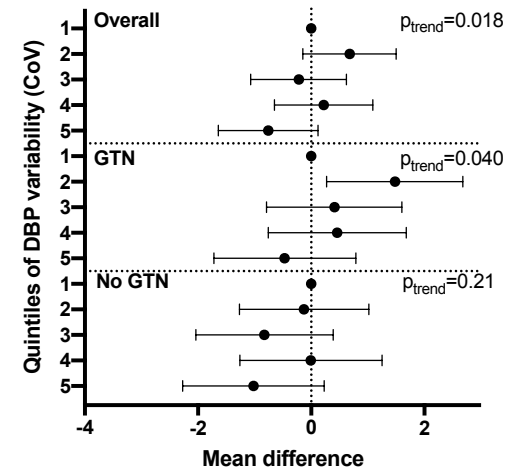

**Supplementary Figure III: Effect of DBP variability over days 1 to 7 (CoV) on day 90 outcomes**

a-b: Quintiles of DBP variability over days 1 to 7 (CoV) vs. mRS at day 90 overall and in GTN and no GTN groups, with the first quintile as reference, (a) overall unadjusted (n=3978), (b) overall adjusted (n=3978).

c: Quintiles of DBP variability over days 1 to 7 (CoV) vs. death at day 90 overall (n=3982) and in GTN and no GTN groups, with the first quintile as reference.

d-f: Quintiles of DBP variability over days 1 to 7 (CoV) vs. cognitive outcomes at day 90 overall and in GTN and no GTN groups, with the first quintile as reference, (d) t-MMSE (n=2019), (e) TICS-M (n=2001), (f) verbal fluency (n=2352).

Ordinal (a-b) or binary (c) logistic or multiple linear (d-f) regression with adjustment for age, sex, baseline mRS, history of previous stroke, history of diabetes, final diagnosis, prior nitrate use, baseline SSS, total anterior circulation stroke, thrombolysis, feeding status, time to randomisation, baseline SBP, GTN vs no GTN, continue/stop. Data are odds ratios with 95% confidence intervals. AF: atrial fibrillation; CoV: coefficient of variation; DBP: diastolic blood pressure; GTN: glyceryl trinitrate; mRS: modified Rankin Scale; SSS: Scandinavian Stroke Scale; t-MMSE: telephone mini-mental state examination; TICS-M: modified telephone interview for cognition scale.

a) Unadjusted mRS, day 90

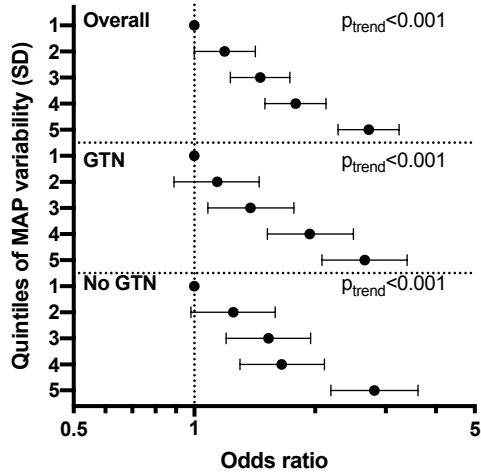

b) Adjusted mRS, day 90

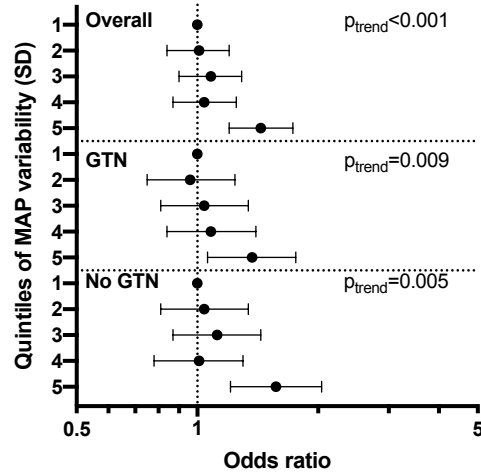

c) Death, day 90

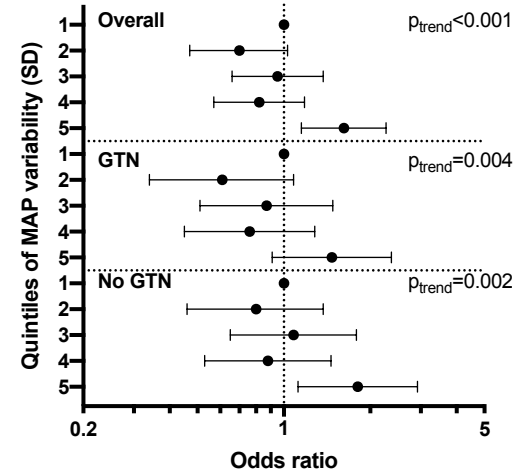

d) t-MMSE, day 90

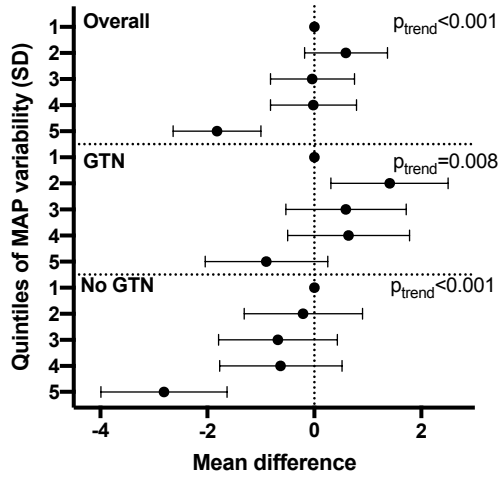

e) TICS-M, day 90

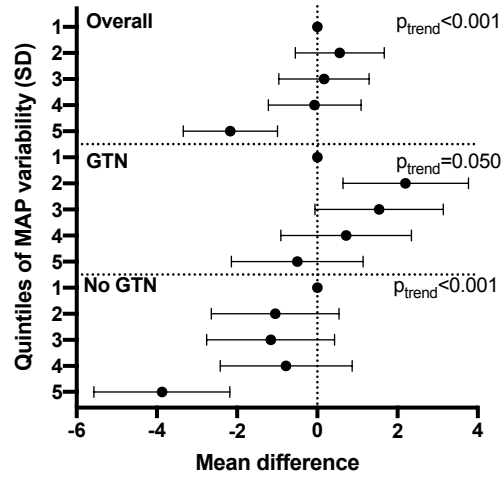

f) Verbal fluency, day 90

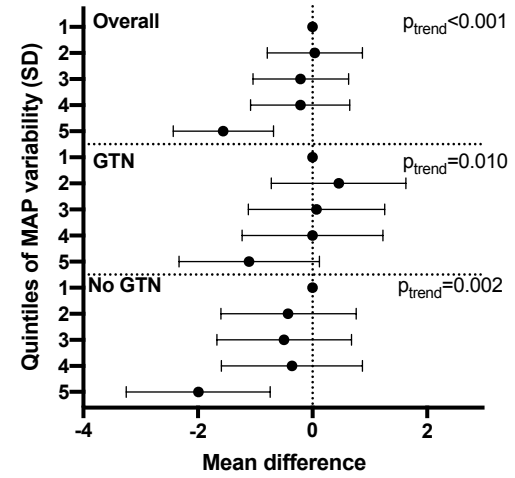



**Supplementary Figure IV: Effect of MAP variability over days 1 to 7 (SD) on day 90 outcomes**

a-b: Quintiles of MAP variability over days 1 to 7 (SD) vs. mRS at day 90 overall and in GTN and no GTN groups, with the first quintile as reference, (a) overall unadjusted (n=3978), (b) overall adjusted (n=3978).

c: Quintiles of MAP variability over days 1 to 7 (SD) vs. death at day 90 overall (n=3982) and in GTN and no GTN groups, with the first quintile as reference.

d-f: Quintiles of MAP variability over days 1 to 7 (SD) vs. cognitive outcomes at day 90 overall and in GTN and no GTN groups, with the first quintile as reference, (a) t-MMSE (n=2019), (b) TICS-M (n=2001), (c) verbal fluency (n=2352).

Ordinal (a-b) or binary (c) logistic or multiple linear (d-f) regression with adjustment for age, sex, baseline mRS, history of previous stroke, history of diabetes, final diagnosis, prior nitrate use, baseline SSS, total anterior circulation stroke, thrombolysis, feeding status, time to randomisation, baseline SBP, GTN vs no GTN, continue/stop. Data are odds ratios with 95% confidence intervals. AF: atrial fibrillation; GTN: glyceryl trinitrate; MAP: mean arterial pressure; mRS: modified Rankin Scale; SD: standard deviation; SSS: Scandinavian Stroke Scale; t-MMSE: telephone mini-mental state examination; TICS-M: modified telephone interview for cognition scale.

a) Unadjusted mRS, day 90

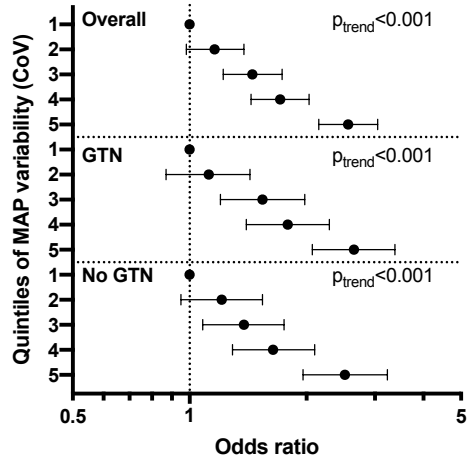

b) Adjusted mRS, day 90

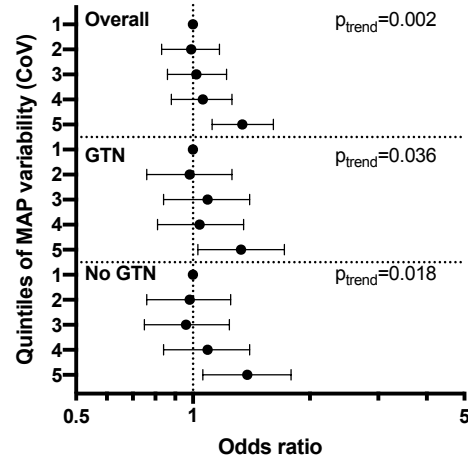

c) Death, day 90

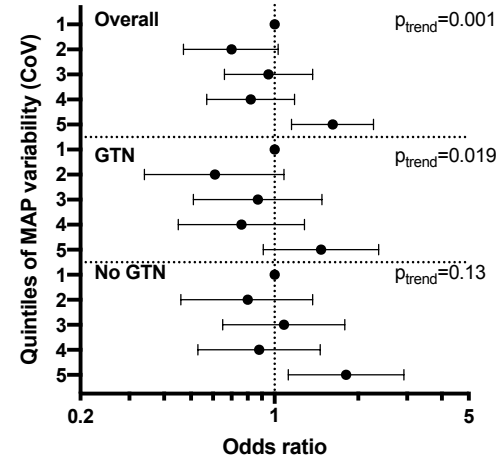

d) t-MMSE, day 90

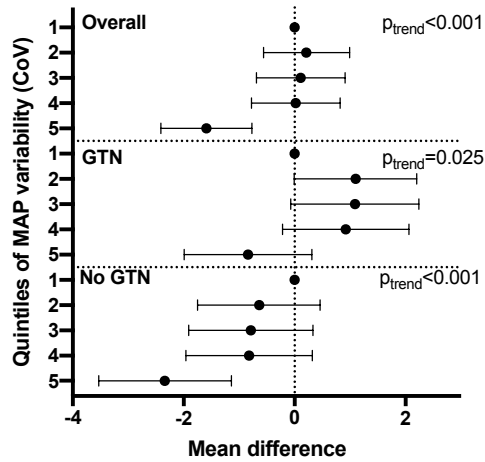

e) TICS-M, day 90

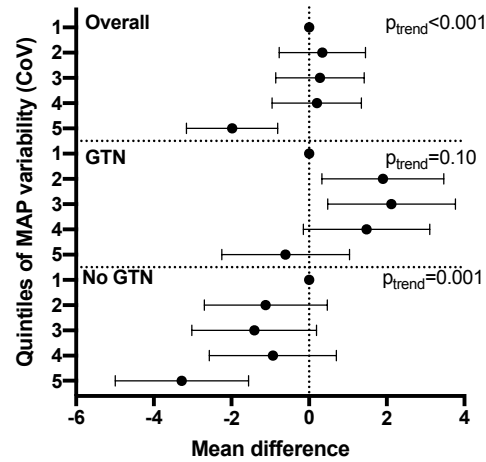

f) Verbal fluency, day 90

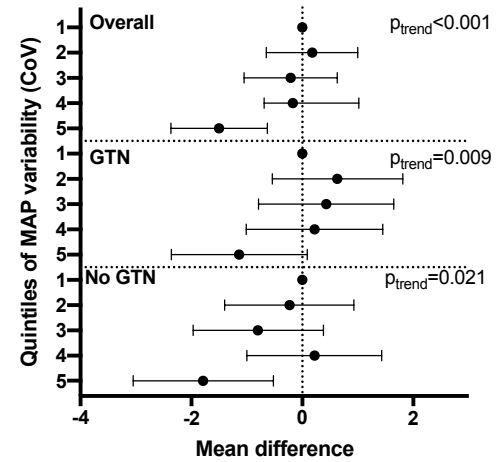

**Supplementary Figure V: Effect of MAP variability over days 1 to 7 (CoV) on day 90 outcomes**

a-b: Quintiles of MAP variability over days 1 to 7 (CoV) vs. mRS at day 90 overall and in GTN and no GTN groups, with the first quintile as reference, (a) overall unadjusted (n=3978), (b) overall adjusted (n=3978).

c: Quintiles of MAP variability over days 1 to 7 (CoV) vs. death at day 90 overall (n=3982) and in GTN and no GTN groups, with the first quintile as reference.

d-f: Quintiles of MAP variability over days 1 to 7 (CoV) vs. cognitive outcomes at day 90 overall and in GTN and no GTN groups, with the first quintile as reference, (a) t-MMSE (n=2019), (b) TICS-M (n=2001), (c) verbal fluency (n=2352).

Ordinal (a-b) or binary (c) logistic or multiple linear (d-f) regression with adjustment for age, sex, baseline mRS, history of previous stroke, history of diabetes, final diagnosis, prior nitrate use, baseline SSS, total anterior circulation stroke, thrombolysis, feeding status, time to randomisation, baseline SBP, GTN vs no GTN, continue/stop. Data are odds ratios with 95% confidence intervals. AF: atrial fibrillation; CoV: coefficient of variation; GTN: glyceryl trinitrate; MAP: mean arterial pressure; mRS: modified Rankin Scale; SSS: Scandinavian Stroke Scale; t-MMSE: telephone mini-mental state examination; TICS-M: modified telephone interview for cognition scale.
